# Supplementary material
Source: Springer Nature journal article supplement (https://www.springerprofessional.de/resource/supplementary/13673_2012_29_MOESM8_ESM.pdf/11899396)
Supplement: MOESM8 [file 11899396]

**Identification of Stakeholders**

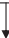

**Calculation of relative importance of stakeholders for "customer satisfaction" aspect using AHP.**

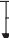

**Allot values for each requirement against "customer satisfaction" aspect.**

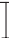

**Compute prioritization value.**

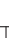

**Compute Implementation costs and Regression count for each requirement.**

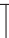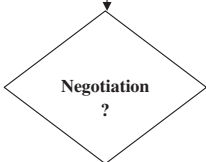

**Negotiation  
?**

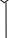

**Compute Final Priority (FP) and select requirements with High FP value.**
